# Supplementary material for: Association Between the Individual and Combined Effects of the GSTM1 and GSTT1 Polymorphisms and Risk of Leukemia: A Meta-Analysis
Source: Front Genet. 2022 Jul 22;13:898937. doi: 10.3389/fgene.2022.898937 (PMC9355274; doi:10.3389/fgene.2022.898937)
Supplement: Supplementary file 2 [file Table1.xlsx]

## Sheet: S1 Table
S1 Table General characteristics and genotype frequency of studies included
First author/Year	Country	Geographic region	Ethnicity	Type of leukemia	GSTM1 genotype distribution				GSTT1 genotype distribution				Combined effects of GSTM1 and GSTT1				Quality score
					Caes		Control		Caes		Control		Caes		Control
					Null	Present	Null	Present	Null	Present	Null	Present	All risk genotype	Present/present	All risk genotype	Present/present
Abdalhabib EK 2021	Saudi Arabia	West Asia	Caucasian	CML	92	58	53	97	64	86	27	123	84	66	20	130	13
Al-Achkar W 2014	Syria	West Asia	Caucasian	CML	54	72	39	133	34	92	27	145	67	59	59	113	10
Al-Eitan LN 2016	Jordan	West Asia	Caucasian	ALL	48	40	92	84	NA	NA	NA	NA	NA	NA	NA	NA	12
Allan JM 2001	UK	Europe	Caucasian	AML	278	228	496	523	98	408	140	879	NA	NA	NA	NA	12
Alves S 2002	Portugal	Europe	Caucasian	ALL	32	15	50	52	9	38	26	76	36	11	65	37	9
Arruda VR 2001	Brazil	South America	Mixed	AML	28	10	102	174	13	25	44	232	10	28	14	262	8
Aydin-Sayitoglu M 2006	Turkey	West Asia	Caucasian	ALL	97	58	77	63	31	124	29	111	NA	NA	NA	NA	10
Aydin-Sayitoglu M 2006	Turkey	West Asia	Caucasian	AML	64	30	77	63	21	73	29	111	NA	NA	NA	NA	10
Baba SM 2021	Saudi Arabia	West Asia	Caucasian	ALL	43	107	56	94	60	90	24	126	87	63	76	74	12
Bajpai P 2007	India	South Asia	Indian	CML	24	56	26	79	16	64	9	96	35	45	32	73	11
Balta G 2003	Turkey	West Asia	Caucasian	ALL	77	62	101	84	29	110	42	143	NA	NA	NA	NA	11
Balta G 2003	Turkey	West Asia	Caucasian	AML	19	12	101	84	2	29	42	143	NA	NA	NA	NA	11
Bănescu C 2014	Romania	Europe	Caucasian	CML	100	68	190	131	35	133	254	67	NA	NA	NA	NA	11
Bănescu C 2016	Romania	Europe	Caucasian	AML	59	43	178	125	24	78	63	240	NA	NA	NA	NA	13
Barnette P 2004	USA	North America	Mixed	ALL	48	46	183	143	9	72	66	234	NA	NA	NA	NA	13
Bhat G 2012	India	South Asia	Indian	CML	31	44	43	81	27	48	26	98	47	28	61	63	9
Bhatla D 2008	USA	North America	Mixed	AML	299	340	218	243	NA	NA	NA	NA	NA	NA	NA	NA	12
Bolufer P 2007	Spain	Europe	Caucasian	ALL	64	76	232	219	36	105	61	394	NA	NA	NA	NA	12
Bolufer P 2007	Spain	Europe	Caucasian	AML	143	152	232	219	74	215	61	394	NA	NA	NA	NA	12
Canalle R 2004	Brazil	South America	Mixed	ALL	48	65	101	120	25	88	43	178	51	62	101	120	13
Chan JY 2011	Singapore	Southeast Asia	Asian	ALL	142	43	122	55	64	121	49	128	NA	NA	NA	NA	11
Chauhan PS 2011	India	South Asia	Indian	AML	45	75	97	105	26	94	58	144	NA	NA	NA	NA	11
Chauhan PS 2012	India	South Asia	Indian	ALL	36	63	95	104	28	71	47	152	NA	NA	NA	NA	11
Chauhan PS 2012	India	South Asia	Indian	AML	50	81	95	104	27	104	47	152	NA	NA	NA	NA	11
Chen CL 1997	USA	North America	Caucasian	ALL	90	73	114	99	23	140	32	181	NA	NA	NA	NA	10
Chen CL 1997	USA	North America	African	ALL	14	20	56	147	12	22	49	154	NA	NA	NA	NA	10
Chen HC 2008	China	East Asia	Asian	ALL	72	48	113	91	61	59	100	104	NA	NA	NA	NA	12
Chen HC 2008	China	East Asia	Asian	AML	82	38	113	91	66	54	100	104	NA	NA	NA	NA	12
Chen HC 2008	China	East Asia	Asian	CML	58	50	113	91	51	57	100	104	NA	NA	NA	NA	12
Clavel J 2005	France	Europe	Caucasian	ALL	94	97	50	55	42	149	23	82	NA	NA	NA	NA	12
Clavel J 2005	France	Europe	Caucasian	AML	14	14	50	55	6	22	23	82	NA	NA	NA	NA	12
Crump C 2000	USA	North America	Mixed	AML	159	138	75	77	48	249	26	126	115	182	62	90	11
D'Alò F 2004	Italy	Europe	Caucasian	AML	82	111	128	145	56	137	52	221	NA	NA	NA	NA	10
Davies SM 2002	USA	North America	Caucasian	ALL	331	285	286	242	96	520	87	445	NA	NA	NA	NA	14
Davies SM 2002	USA	North America	African	ALL	14	21	64	137	6	29	56	145	NA	NA	NA	NA	10
Dunna NR 2013	India	South Asia	Indian	ALL	89	63	94	157	38	114	39	212	NA	NA	NA	NA	11
Dunna NR 2013	India	South Asia	Indian	AML	90	52	94	157	57	85	39	212	NA	NA	NA	NA	11
Eyada TK 2007	Egypt	North Africa	Caucasian	ALL	6	7	0	11	3	10	5	6	NA	NA	NA	NA	7
Eyada TK 2007	Egypt	North Africa	Caucasian	AML	13	6	0	11	9	10	5	6	NA	NA	NA	NA	7
Farasani A 2019	Saudi Arabia	West Asia	Caucasian	AML	34	66	44	56	13	87	21	79	46	54	44	56	11
Feng JF 2004	China	East Asia	Asian	AML	36	13	77	69	30	19	72	74	NA	NA	NA	NA	6
Gra OA 2008	Russia	Europe	Caucasian	ALL	181	151	238	252	104	228	94	396	NA	NA	NA	NA	13
Gra OA 2008	Russia	Europe	Caucasian	AML	28	33	238	252	21	50	94	396	NA	NA	NA	NA	13
Guven M 2015	Turkey	West Asia	Caucasian	ALL	45	50	99	91	24	71	52	138	60	35	131	59	9
Haase D 2002	Germany	Europe	Caucasian	AML	50	163	51	188	23	190	16	223	NA	NA	NA	NA	10
Haranatha Reddy P 2006	India	South Asia	Indian	ALL	60	75	61	88	48	87	23	123	NA	NA	NA	NA	9
Hishida A 2005	Japan	East Asia	Asian	CML	26	25	249	227	29	22	238	238	NA	NA	NA	NA	13
Idris HM 2020	Saudi Arabia	West Asia	Caucasian	CML	68	132	35	65	85	115	21	79	109	91	47	53	12
Jiang LJ 2010	China	East Asia	Asian	ALL	68	21	49	41	54	35	44	46	NA	NA	NA	NA	8
Joseph T 2004	India	South Asia	Indian	ALL	48	70	29	89	17	101	10	108	59	59	36	82	10
Kassogue Y 2015	Morocco	North Africa	Caucasian	CML	45	47	38	55	16	76	9	84	55	37	42	51	11
Kim HN 2012	Korea	East Asia	Asian	AML	230	168	923	777	214	184	859	841	NA	NA	NA	NA	12
Krajinovic M 1999	Canada	North America	Caucasian	ALL	113	61	156	148	28	148	47	227	NA	NA	NA	NA	10
Kreile M 2016	Latvia	Europe	Caucasian	ALL	42	34	58	63	21	55	22	99	NA	NA	NA	NA	11
Lemos MC 1999	Portugal	Europe	Caucasian	ALL	14	8	74	54	NA	NA	NA	NA	NA	NA	NA	NA	7
Lemos MC 1999	Portugal	Europe	Caucasian	AML	10	8	74	54	NA	NA	NA	NA	NA	NA	NA	NA	7
Lemos MC 1999	Portugal	Europe	Caucasian	CLL	5	8	74	54	NA	NA	NA	NA	NA	NA	NA	NA	7
Lemos MC 1999	Portugal	Europe	Caucasian	CML	9	2	74	54	NA	NA	NA	NA	NA	NA	NA	NA	7
Li YH 2012	China	East Asia	Asian	ALL	28	13	49	51	24	17	44	56	NA	NA	NA	NA	6
Liu P 2017	China	East Asia	Asian	Leukemia	248	176	227	193	154	270	114	306	93	331	61	359	14
Liu QX 2005	China	East Asia	Asian	ALL	68	44	113	91	57	55	100	104	88	24	158	46	9
Liu QX 2005	China	East Asia	Asian	AML	82	38	113	91	66	54	100	104	101	19	158	46	9
Loffler H 2001	Germany	Europe	Caucasian	CML	77	64	84	64	31	110	26	124	NA	NA	NA	NA	10
Lopes BA 2015	Brazil	South America	Mixed	Acute Leukemia	126	164	139	203	75	215	85	257	NA	NA	NA	NA	12
Lordelo GS 2012	Brazil	South America	Mixed	CML	55	50	176	97	21	84	65	208	NA	NA	NA	NA	10
Lourenco GJ 2005	Brazil	South America	Mixed	CML	54	71	149	192	23	102	60	281	NA	NA	NA	NA	12
Majumdar S 2008	India	South Asia	Indian	AML	57	53	34	110	16	94	11	133	NA	NA	NA	NA	13
Mandegary A 2011	Iran	West Asia	Caucasian	APL	64	50	48	51	45	69	23	76	76	37	60	39	11
Mondal BC 2005	India	South Asia	Indian	ALL	23	58	34	89	16	65	9	114	NA	NA	NA	NA	11
Moulik NR 2014	India	South Asia	Indian	ALL	35	65	84	216	31	69	45	255	55	45	120	180	13
Muddathir ARM 2019	Sudan	North Africa	Mixed	CML	68	47	42	62	76	39	39	65	NA	NA	NA	NA	10
Muller P 2008	Israel	West Asia	Caucasian	AML	70	66	119	98	25	111	44	173	NA	NA	NA	NA	10
Naoe T 2000	Japan	East Asia	Asian	AML	227	184	77	73	197	214	81	69	NA	NA	NA	NA	12
Nasr AS 2015	Egypt	North Africa	Caucasian	AML	24	26	7	43	30	20	4	46	NA	NA	NA	NA	8
Ouerhani 2011	Tunisia	NORTH Africa	Caucasian	Leukemia	110	83	163	146	66	127	88	221	134	59	212	97	10
Ovsepian VA 2010	Russia	Europe	Caucasian	CML	44	39	94	111	20	63	27	178	NA	NA	NA	NA	10
Özten N 2012	Turkey	West Asia	Caucasian	CML	48	58	81	109	47	59	35	155	68	38	110	80	10
Pakakasama S 2005	Thailand	Southeast Asia	Asian	ALL	76	31	191	129	50	57	122	118	NA	NA	NA	NA	13
Pigullo S 2007	Italy	Europe	Caucasian	ALL	152	171	200	184	44	279	69	315	156	137	232	152	11
Rimando MG 2008	The Philippines	Southeast Asia	Asian	ALL	43	17	31	29	21	39	20	40	NA	NA	NA	NA	8
Rollinson S 2000	UK	Europe	Caucasian	ALL	35	35	55	58	15	55	9	104	42	28	60	53	10
Rollinson S 2000	UK	Europe	Caucasian	AML	258	217	407	419	89	386	125	701	295	180	453	373	12
Rostami G 2019	Iran	West Asia	Caucasian	CML	70	34	51	53	3	101	1	103	72	32	51	53	8
Saadat I 2000	Iran	West Asia	Caucasian	ALL	12	26	41	34	NA	NA	NA	NA	NA	NA	NA	NA	6
Sasai Y 1999	Japan	East Asia	Asian	AML	21	19	23	20	19	21	13	30	NA	NA	NA	NA	6
Seedhouse C 2004	UK	Europe	Caucasian	AML	120	122	242	177	NA	NA	NA	NA	NA	NA	NA	NA	10
Souza CL 2008	Brazil	South America	Mixed	APL	11	12	114	190	9	14	39	265	16	7	139	165	11
Souza CL 2008	Brazil	South America	Mixed	CML	17	36	114	90	10	43	39	265	25	28	139	165	11
Suneetha KJ 2008	India	South Asia	Indian	ALL	36	56	37	113	NA	NA	NA	NA	NA	NA	NA	NA	10
Suneetha KJ 2011	India	South Asia	Indian	ALL	NA	NA	NA	NA	11	81	20	130	NA	NA	NA	NA	10
Taspinar M 2008	Turkey	West Asia	Caucasian	CML	48	59	55	75	43	64	25	105	67	40	72	57	10
Wang J 2004	China	East Asia	Asian	ALL	51	16	77	69	41	26	72	74	NA	NA	NA	NA	8
Wang WJ 2002	China	East Asia	Asian	Leukemia	25	9	12	22	NA	NA	NA	NA	NA	NA	NA	NA	7
Weich N 2015	Argentina	South America	Mixed	Acute Leukemia	6	30	48	75	3	33	14	109	NA	NA	NA	NA	8
Weich N 2016	Argentina	South America	Mixed	CML	56	85	57	84	20	121	24	117	69	72	71	70	10
Woo MH 2000	USA	North America	Mixed	AML	27	30	125	117	15	42	42	200	33	24	146	99	10
Wu YX 2004	China	East Asia	Asian	Leukemia	26	35	16	47	NA	NA	NA	NA	NA	NA	NA	NA	6
Yang L 2005	China	East Asia	Asian	AML	142	86	127	114	110	118	108	133	NA	NA	NA	NA	7
Yuille M 2002	UK	Europe	Caucasian	CLL	77	61	135	135	41	97	66	212	NA	NA	NA	NA	13
Zehra A 2018	Pakistan	South Asia	Indian	ALL	29	33	28	34	7	55	4	58	35	27	30	32	8
Zhang L 2003	China	East Asia	Asian	AML	23	9	77	69	19	13	72	74	NA	NA	NA	NA	8
Zhou L 2013	China	East Asia	Asian	AML	86	77	97	107	61	102	55	149	128	45	127	77	10
Zi Y 2014	China	East Asia	Asian	AML	114	92	107	124	73	133	55	176	165	41	150	81	11
Zou LL 2004	China	East Asia	Asian	ALL	10	6	99	84	14	2	89	94	NA	NA	NA	NA	6
Zou LL 2004	China	East Asia	Asian	AML	17	8	99	84	14	11	89	94	NA	NA	NA	NA	6
CML: chronic myeloid leukemia; AML: Acute myeloid leukemia; ALL: Acute lymphoblastic leukemia; CLL: chronic lymphoblastic leukemia; APL: Acute Promyelocytic Leukemia
